# Supplementary material for: A Poly-N-Acetylglucosamine−Shiga Toxin Broad-Spectrum Conjugate Vaccine for Shiga Toxin-Producing Escherichia coli
Source: PubMed Central journal article supplement — mBio. 2014 Mar 25;5(2):e00974-14. doi: 10.1128/mBio.00974-14 (PMC3977355; doi:10.1128/mbio.00974-14), 2014-03-25

**Figure S2.** Determination of STEC CFU in mouse tissues at various time points post-infection of 5-day old CD-1 mice via oral gavage with *E. coli* EDL933 ( $5 \times 10^8$  CFU/mouse). Points indicate values for individual mice, lines the geometric means. No bacteria were detected outside of the GI tract (limit of detection 2 CFU/gram, far right panel).

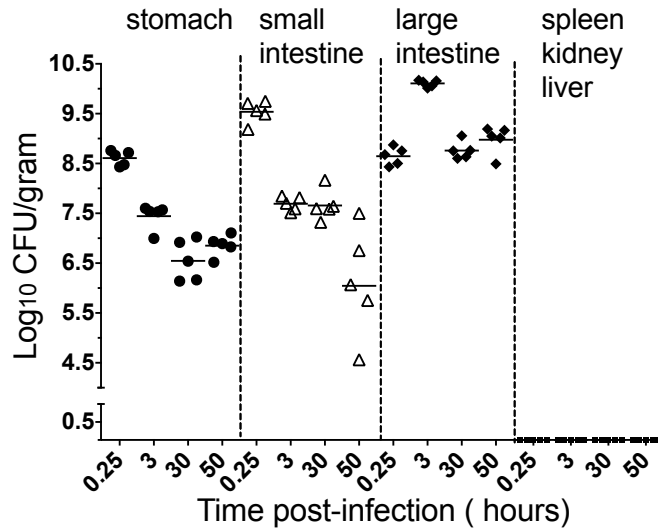

Supplement: mbo002141778sf02.pdf [file mbo002141778sf02.pdf]
