# Supplementary material for: A Poly-N-Acetylglucosamine−Shiga Toxin Broad-Spectrum Conjugate Vaccine for Shiga Toxin-Producing Escherichia coli
Source: PubMed Central journal article supplement — mBio. 2014 Mar 25;5(2):e00974-14. doi: 10.1128/mBio.00974-14 (PMC3977355; doi:10.1128/mbio.00974-14), 2014-03-25
Supplement: mbo002141778sf03.pdf [file mbo002141778sf03.pdf]

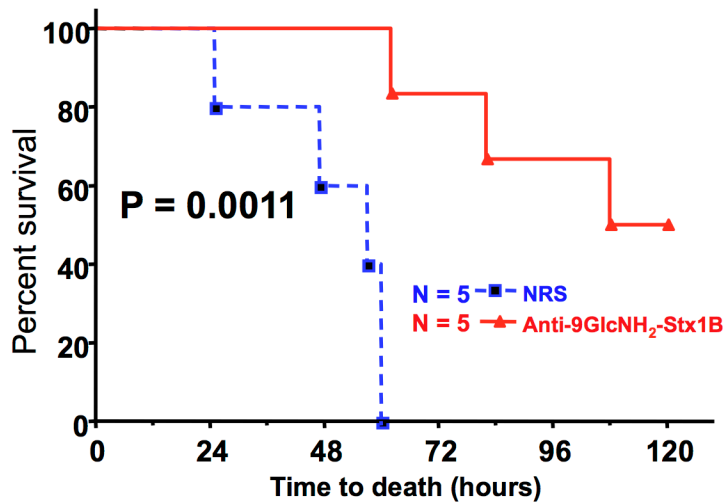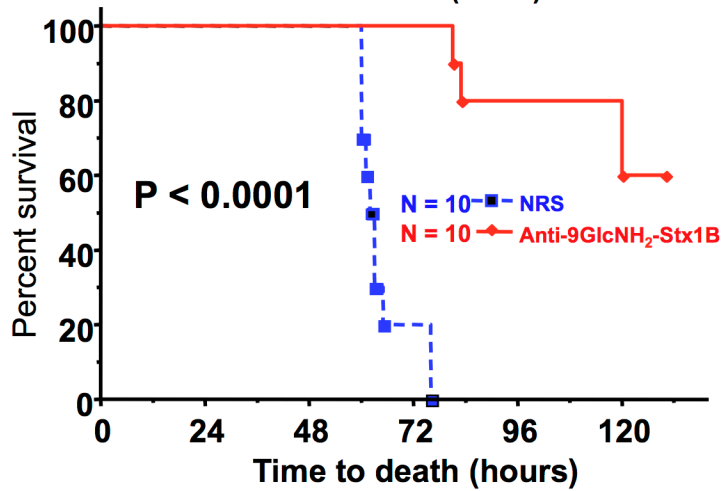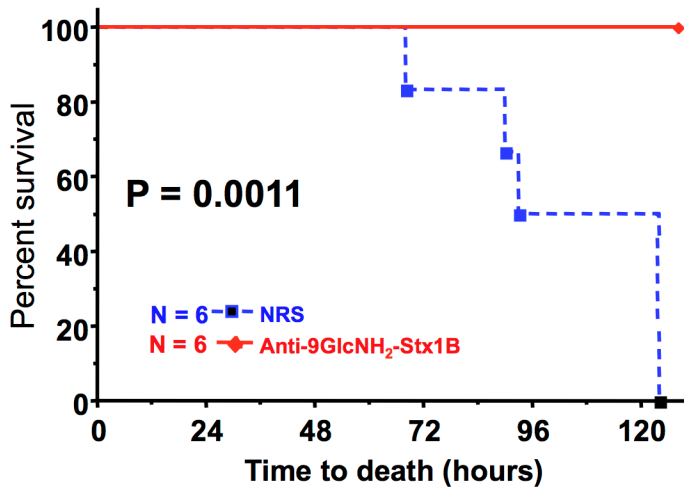

**Figure S3.** Protective efficacy of antibody raised to the synthetic oligosaccharide-conjugate vaccine (9GlcNH<sub>2</sub>)-Stx1b against EDL933. Infant mice were given 80  $\mu$ l of the indicated antisera 24 and 4 h prior to challenge with  $\sim 8-9 \times 10^8$  EDL933 CFU/mouse. P values generated by log-rank analysis of the survival curves.
